# Supplementary material
Source: publisher figshare collection journal article supplement (https://gsajournals.figshare.com/ndownloader/files/27387788)
Supplement: Supplementary file 1 [file 27387788]

## Sheet: Aged FHV48h up specific 
Table S9.	GO analysis of upregulated genes specific to Aged FHV 48h
Biological process
Category	Term	Count	%	PValue	Genes	List Total	Pop Hits	Pop Total	Fold Enrichment	Bonferroni	Benjamini	FDR
GOTERM_BP_DIRECT	GO:0022008~neurogenesis	66	8.10811	6.55239e-10	FBGN0014861, FBGN0039125, FBGN0038597, FBGN0020306, FBGN0037384, FBGN0033264, FBGN0040395, FBGN0036574, FBGN0037025, FBGN0266916, FBGN0032298, FBGN0263600, FBGN0051097, FBGN0026207, FBGN0029755, FBGN0261065, FBGN0028343, FBGN0027493, FBGN0035524, FBGN0035689, FBGN0031886, FBGN0010292, FBGN0015621, FBGN0038964, FBGN0010770, FBGN0061200, FBGN0030241, FBGN0031098, FBGN0026679, FBGN0039691, FBGN00370…	569	565	10996	2.25745	9.27818e-07	9.27819e-07	9.25198e-07
GOTERM_BP_DIRECT	GO:0008340~determination of adult lifespan	23	2.82555	6.22984e-05	FBGN0037960, FBGN0028707, FBGN0022764, FBGN0263316, FBGN0262866, FBGN0004901, FBGN0000565, FBGN0001257, FBGN0004657, FBGN0030766, FBGN0029856, FBGN0261560, FBGN0263490, FBGN0030695, FBGN0000097, FBGN0283472, FBGN0035468, FBGN0045443, FBGN0051216, FBGN0034009, FBGN0031820, FBGN0010303, FBGN0033846	569	170	10996	2.61458	0.084438	0.0441072	0.0439826
GOTERM_BP_DIRECT	GO:0006351~transcription, DNA-templated	37	4.54545	0.000252801	FBGN0020306, FBGN0023518, FBGN0262955, FBGN0038390, FBGN0260397, FBGN0262656, FBGN0039066, FBGN0028402, FBGN0001341, FBGN0025455, FBGN0005386, FBGN0000097, FBGN0027553, FBGN0019938, FBGN0015799, FBGN0030877, FBGN0033846, FBGN0038860, FBGN0037770, FBGN0035213, FBGN0061200, FBGN0263755, FBGN0262127, FBGN0030687, FBGN0003277, FBGN0031434, FBGN0003278, FBGN0003231, FBGN0003870, FBGN0000283, FBGN02507…	569	376	10996	1.90168	0.300935	0.0950512	0.0947827
GOTERM_BP_DIRECT	GO:0007015~actin filament organization	14	1.7199	0.000345989	FBGN0011570, FBGN0261811, FBGN0044826, FBGN0004657, FBGN0004876, FBGN0027598, FBGN0004367, FBGN0004389, FBGN0003475, FBGN0025455, FBGN0283472, FBGN0011742, FBGN0011202, FBGN0010501	569	84	10996	3.22086	0.387377	0.0950512	0.0947827
GOTERM_BP_DIRECT	GO:0009267~cellular response to starvation	15	1.84275	0.000349242	FBGN0038597, FBGN0037363, FBGN0086676, FBGN0038964, FBGN0259937, FBGN0033661, FBGN0023527, FBGN0264357, FBGN0003079, FBGN0020261, FBGN0028411, FBGN0029131, FBGN0026196, FBGN0033557, FBGN0010501	569	95	10996	3.05134	0.390193	0.0950512	0.0947827
GOTERM_BP_DIRECT	GO:0007298~border follicle cell migration	18	2.2113	0.000402759	FBGN0011570, FBGN0032363, FBGN0001404, FBGN0001987, FBGN0262127, FBGN0043903, FBGN0260049, FBGN0004657, FBGN0027598, FBGN0001297, FBGN0003079, FBGN0003388, FBGN0266671, FBGN0003870, FBGN0000097, FBGN0038206, FBGN0034009, FBGN0010303	569	131	10996	2.65536	0.434713	0.0950512	0.0947827
GOTERM_BP_DIRECT	GO:0042254~ribosome biogenesis	8	0.982801	0.00124694	FBGN0010292, FBGN0032408, FBGN0037137, FBGN0259937, FBGN0032882, FBGN0038746, FBGN0053230, FBGN0015393	569	33	10996	4.68488	0.829117	0.235533	0.234867
GOTERM_BP_DIRECT	GO:0000470~maturation of LSU-rRNA	6	0.737101	0.00133069	FBGN0032050, FBGN0032408, FBGN0030067, FBGN0032298, FBGN0015393, FBGN0038617	569	17	10996	6.82063	0.848249	0.235533	0.234867
GOTERM_BP_DIRECT	GO:0016239~positive regulation of macroautophagy	5	0.614251	0.00173726	FBGN0003231, FBGN0283472, FBGN0029131, FBGN0027518, FBGN0010501	569	11	10996	8.78415	0.914744	0.254124	0.253406
GOTERM_BP_DIRECT	GO:0007444~imaginal disc development	8	0.982801	0.00179466	FBGN0020416, FBGN0004367, FBGN0261811, FBGN0010770, FBGN0000490, FBGN0016031, FBGN0030054, FBGN0020414	569	35	10996	4.41717	0.921411	0.254124	0.253406
GOTERM_BP_DIRECT	GO:0051301~cell division	11	1.35135	0.00270538	FBGN0014861, FBGN0086695, FBGN0040765, FBGN0265574, FBGN0050169, FBGN0010313, FBGN0278604, FBGN0032863, FBGN0087021, FBGN0040208, FBGN0010314	569	69	10996	3.08082	0.97842	0.348256	0.347272
GOTERM_BP_DIRECT	GO:0007049~cell cycle	7	0.859951	0.00317312	FBGN0014861, FBGN0020306, FBGN0013548, FBGN0038390, FBGN0011202, FBGN0263933, FBGN0033846	569	29	10996	4.66469	0.988894	0.374428	0.37337
GOTERM_BP_DIRECT	GO:0007476~imaginal disc-derived wing morphogenesis	22	2.7027	0.00415379	FBGN0015402, FBGN0010395, FBGN0014133, FBGN0032451, FBGN0040319, FBGN0020389, FBGN0002932, FBGN0004635, FBGN0000352, FBGN0011817, FBGN0030766, FBGN0003310, FBGN0029944, FBGN0003079, FBGN0003396, FBGN0020261, FBGN0000490, FBGN0003870, FBGN0250786, FBGN0037315, FBGN0013764, FBGN0086384	569	217	10996	1.95923	0.997244	0.452443	0.451165
GOTERM_BP_DIRECT	GO:0007474~imaginal disc-derived wing vein specification	9	1.10565	0.00547037	FBGN0262937, FBGN0011817, FBGN0002783, FBGN0000490, FBGN0010313, FBGN0260397, FBGN0262866, FBGN0039066, FBGN0004635	569	53	10996	3.28163	0.999577	0.553289	0.551726
GOTERM_BP_DIRECT	GO:0048477~oogenesis	28	3.4398	0.0067373	FBGN0020306, FBGN0086676, FBGN0036574, FBGN0001404, FBGN0260397, FBGN0002716, FBGN0262656, FBGN0001301, FBGN0263143, FBGN0267487, FBGN0000490, FBGN0005386, FBGN0283472, FBGN0003483, FBGN0033846, FBGN0010501, FBGN0010770, FBGN0263755, FBGN0261574, FBGN0004924, FBGN0260780, FBGN0004901, FBGN0000567, FBGN0003310, FBGN0004367, FBGN0003475, FBGN0001234, FBGN0250786	569	315	10996	1.71779	0.99993	0.636001	0.634204
GOTERM_BP_DIRECT	GO:0045089~positive regulation of innate immune response	7	0.859951	0.00722078	FBGN0041205, FBGN0013983, FBGN0030695, FBGN0028707, FBGN0261574, FBGN0067783, FBGN0038928	569	34	10996	3.9787	0.999965	0.639039	0.637234
GOTERM_BP_DIRECT	GO:0045476~nurse cell apoptotic process	5	0.614251	0.00779638	FBGN0011706, FBGN0086676, FBGN0000490, FBGN0019972, FBGN0010501	569	16	10996	6.0391	0.999985	0.649393	0.647558
GOTERM_BP_DIRECT	GO:0006886~intracellular protein transport	13	1.59705	0.00839393	FBGN0036341, FBGN0032120, FBGN0038401, FBGN0042177, FBGN0037894, FBGN0001308, FBGN0031536, FBGN0024273, FBGN0266572, FBGN0035995, FBGN0035879, FBGN0034009, FBGN0033713	569	106	10996	2.37006	0.999993	0.660322	0.658457
GOTERM_BP_DIRECT	GO:0000460~maturation of 5.8S rRNA	4	0.4914	0.00911374	FBGN0032408, FBGN0030067, FBGN0032298, FBGN0038617	569	9	10996	8.58895	0.999998	0.679214	0.677295
GOTERM_BP_DIRECT	GO:0046777~protein autophosphorylation	6	0.737101	0.00963177	FBGN0011817, FBGN0003079, FBGN0037098, FBGN0036896, FBGN0044826, FBGN0002413	569	26	10996	4.45965	0.999999	0.681929	0.680003
GOTERM_BP_DIRECT	GO:0007422~peripheral nervous system development	11	1.35135	0.0110361	FBGN0086676, FBGN0003396, FBGN0003870, FBGN0022764, FBGN0015391, FBGN0278604, FBGN0260440, FBGN0015393, FBGN0013765, FBGN0002932, FBGN0004635	569	84	10996	2.53067	1	0.744147	0.742045
GOTERM_BP_DIRECT	GO:0061057~peptidoglycan recognition protein signaling pathway	5	0.614251	0.0120775	FBGN0041205, FBGN0013983, FBGN0030695, FBGN0038928, FBGN0031381	569	18	10996	5.36809	1	0.771152	0.768974
GOTERM_BP_DIRECT	GO:0002230~positive regulation of defense response to virus by host	4	0.4914	0.0125258	FBGN0041205, FBGN0013983, FBGN0028707, FBGN0038928	569	10	10996	7.73005	1	0.771152	0.768974
GOTERM_BP_DIRECT	GO:0018023~peptidyl-lysine trimethylation	3	0.36855	0.0149068	FBGN0052732, FBGN0031003, FBGN0053230	569	4	10996	14.4938	1	0.831893	0.829543
GOTERM_BP_DIRECT	GO:0035220~wing disc development	11	1.35135	0.015032	FBGN0011570, FBGN0001297, FBGN0037098, FBGN0031149, FBGN0259937, FBGN0022764, FBGN0003319, FBGN0004858, FBGN0263933, FBGN0040208, FBGN0039849	569	88	10996	2.41564	1	0.831893	0.829543
GOTERM_BP_DIRECT	GO:0042981~regulation of apoptotic process	7	0.859951	0.0158828	FBGN0000352, FBGN0086785, FBGN0000490, FBGN0262656, FBGN0043903, FBGN0031820, FBGN0086384	569	40	10996	3.3819	1	0.831893	0.829543
GOTERM_BP_DIRECT	GO:0016180~snRNA processing	4	0.4914	0.0165715	FBGN0035462, FBGN0034964, FBGN0026679, FBGN0039691	569	11	10996	7.02732	1	0.831893	0.829543
GOTERM_BP_DIRECT	GO:0006405~RNA export from nucleus	4	0.4914	0.0165715	FBGN0010660, FBGN0061200, FBGN0034118, FBGN0037924	569	11	10996	7.02732	1	0.831893	0.829543
GOTERM_BP_DIRECT	GO:0000462~maturation of SSU-rRNA from tricistronic rRNA transcript (SSU-rRNA, 5.8S rRNA, LSU-rRNA)	6	0.737101	0.0176189	FBGN0038597, FBGN0029755, FBGN0033557, FBGN0023527, FBGN0034734, FBGN0037073	569	30	10996	3.86503	1	0.831893	0.829543
GOTERM_BP_DIRECT	GO:0050912~detection of chemical stimulus involved in sensory perception of taste	5	0.614251	0.0176248	FBGN0041233, FBGN0035870, FBGN0035468, FBGN0003747, FBGN0265139	569	20	10996	4.83128	1	0.831893	0.829543
GOTERM_BP_DIRECT	GO:0006979~response to oxidative stress	11	1.35135	0.0200178	FBGN0261560, FBGN0261987, FBGN0038469, FBGN0283472, FBGN0028707, FBGN0263316, FBGN0263933, FBGN0000565, FBGN0051216, FBGN0031820, FBGN0030459	569	92	10996	2.31061	1	0.914363	0.91178
GOTERM_BP_DIRECT	GO:0016458~gene silencing	5	0.614251	0.0209045	FBGN0020306, FBGN0028707, FBGN0260397, FBGN0263755, FBGN0026427	569	21	10996	4.60122	1	0.925022	0.922409
GOTERM_BP_DIRECT	GO:0008285~negative regulation of cell proliferation	7	0.859951	0.0221623	FBGN0267487, FBGN0003396, FBGN0000490, FBGN0015799, FBGN0002525, FBGN0086384, FBGN0053172	569	43	10996	3.14595	1	0.950965	0.948278
GOTERM_BP_DIRECT	GO:0001736~establishment of planar polarity	6	0.737101	0.0228872	FBGN0011817, FBGN0001297, FBGN0086898, FBGN0067864, FBGN0260049, FBGN0010303	569	32	10996	3.62346	1	0.953183	0.950491
GOTERM_BP_DIRECT	GO:0000723~telomere maintenance	5	0.614251	0.024534	FBGN0004367, FBGN0031540, FBGN0028707, FBGN0001206, FBGN0028515	569	22	10996	4.39208	1	0.985008	0.982225
GOTERM_BP_DIRECT	GO:0008039~synaptic target recognition	6	0.737101	0.025865	FBGN0034718, FBGN0001987, FBGN0052373, FBGN0031381, FBGN0250871, FBGN0035539	569	33	10996	3.51366	1	0.985008	0.982225
GOTERM_BP_DIRECT	GO:0007184~SMAD protein import into nucleus	4	0.4914	0.0266009	FBGN0033264, FBGN0010660, FBGN0061200, FBGN0027537	569	13	10996	5.94619	1	0.985008	0.982225
GOTERM_BP_DIRECT	GO:0045944~positive regulation of transcription from RNA polymerase II promoter	20	2.457	0.0270096	FBGN0041205, FBGN0037384, FBGN0039067, FBGN0037720, FBGN0061200, FBGN0039039, FBGN0262732, FBGN0025679, FBGN0040305, FBGN0000567, FBGN0001297, FBGN0052732, FBGN0003396, FBGN0025455, FBGN0003870, FBGN0027553, FBGN0035954, FBGN0035205, FBGN0033636, FBGN0035407	569	228	10996	1.69519	1	0.985008	0.982225
GOTERM_BP_DIRECT	GO:0006364~rRNA processing	7	0.859951	0.0271681	FBGN0010926, FBGN0259937, FBGN0033661, FBGN0065098, FBGN0036754, FBGN0026196, FBGN0039828	569	45	10996	3.00613	1	0.985008	0.982225
GOTERM_BP_DIRECT	GO:0007076~mitotic chromosome condensation	5	0.614251	0.0285207	FBGN0003483, FBGN0010313, FBGN0015391, FBGN0026427, FBGN0051989	569	23	10996	4.20112	1	0.985008	0.982225
GOTERM_BP_DIRECT	GO:0006378~mRNA polyadenylation	5	0.614251	0.0285207	FBGN0003321, FBGN0015621, FBGN0261065, FBGN0260780, FBGN0039691	569	23	10996	4.20112	1	0.985008	0.982225
GOTERM_BP_DIRECT	GO:0060253~negative regulation of glial cell proliferation	3	0.36855	0.03478	FBGN0262127, FBGN0041171, FBGN0086384	569	6	10996	9.66257	1	1	0.99788
GOTERM_BP_DIRECT	GO:0007021~tubulin complex assembly	3	0.36855	0.03478	FBGN0051961, FBGN0264694, FBGN0039869	569	6	10996	9.66257	1	1	0.99788
GOTERM_BP_DIRECT	GO:0045746~negative regulation of Notch signaling pathway	7	0.859951	0.0359908	FBGN0031434, FBGN0023388, FBGN0039402, FBGN0031872, FBGN0260440, FBGN0262656, FBGN0039273	569	48	10996	2.81825	1	1	0.99788
GOTERM_BP_DIRECT	GO:0006338~chromatin remodeling	7	0.859951	0.0359908	FBGN0000042, FBGN0061200, FBGN0030891, FBGN0004924, FBGN0030093, FBGN0031876, FBGN0030877	569	48	10996	2.81825	1	1	0.99788
GOTERM_BP_DIRECT	GO:0007010~cytoskeleton organization	6	0.737101	0.036237	FBGN0051352, FBGN0000042, FBGN0011742, FBGN0011785, FBGN0003319, FBGN0262114	569	36	10996	3.22086	1	1	0.99788
GOTERM_BP_DIRECT	GO:0006915~apoptotic process	9	1.10565	0.039022	FBGN0011706, FBGN0019972, FBGN0001977, FBGN0029131, FBGN0033971, FBGN0036237, FBGN0038928, FBGN0010501, FBGN0040658	569	75	10996	2.31902	1	1	0.99788
GOTERM_BP_DIRECT	GO:0012501~programmed cell death	4	0.4914	0.0392093	FBGN0011706, FBGN0086676, FBGN0019972, FBGN0010501	569	15	10996	5.15337	1	1	0.99788
GOTERM_BP_DIRECT	GO:0008356~asymmetric cell division	5	0.614251	0.0426669	FBGN0011020, FBGN0024273, FBGN0260440, FBGN0013765, FBGN0002932	569	26	10996	3.71637	1	1	0.99788
GOTERM_BP_DIRECT	GO:0043087~regulation of GTPase activity	7	0.859951	0.0427872	FBGN0033539, FBGN0039056, FBGN0038401, FBGN0030286, FBGN0035879, FBGN0034009, FBGN0261787	569	50	10996	2.70552	1	1	0.99788
GOTERM_BP_DIRECT	GO:0043524~negative regulation of neuron apoptotic process	4	0.4914	0.0464585	FBGN0011706, FBGN0029131, FBGN0263933, FBGN0051216	569	16	10996	4.83128	1	1	0.99788
GOTERM_BP_DIRECT	GO:0007160~cell-matrix adhesion	4	0.4914	0.0464585	FBGN0051004, FBGN0034880, FBGN0010395, FBGN0004657	569	16	10996	4.83128	1	1	0.99788
GOTERM_BP_DIRECT	GO:0006260~DNA replication	7	0.859951	0.0464676	FBGN0014861, FBGN0002906, FBGN0015929, FBGN0031540, FBGN0004924, FBGN0011762, FBGN0023180	569	51	10996	2.65247	1	1	0.99788
GOTERM_BP_DIRECT	GO:0006750~glutathione biosynthetic process	3	0.36855	0.0470504	FBGN0030882, FBGN0046114, FBGN0040319	569	7	10996	8.2822	1	1	0.99788
GOTERM_BP_DIRECT	GO:0030707~ovarian follicle cell development	10	1.2285	0.047633	FBGN0000352, FBGN0261987, FBGN0266671, FBGN0000490, FBGN0003870, FBGN0001977, FBGN0001404, FBGN0002932, FBGN0004635, FBGN0010303	569	92	10996	2.10056	1	1	0.99788
GOTERM_BP_DIRECT	GO:0007131~reciprocal meiotic recombination	5	0.614251	0.0539326	FBGN0030931, FBGN0004367, FBGN0002906, FBGN0036486, FBGN0002716	569	28	10996	3.45092	1	1	0.99788
GOTERM_BP_DIRECT	GO:0030162~regulation of proteolysis	5	0.614251	0.0539326	FBGN0000352, FBGN0001234, FBGN0031098, FBGN0263933, FBGN0041171	569	28	10996	3.45092	1	1	0.99788
GOTERM_BP_DIRECT	GO:0032508~DNA duplex unwinding	4	0.4914	0.0543169	FBGN0002906, FBGN0031540, FBGN0028515, FBGN0030877	569	17	10996	4.54709	1	1	0.99788
GOTERM_BP_DIRECT	GO:0000027~ribosomal large subunit assembly	4	0.4914	0.0543169	FBGN0032408, FBGN0010770, FBGN0033661, FBGN0035524	569	17	10996	4.54709	1	1	0.99788
GOTERM_BP_DIRECT	GO:0008586~imaginal disc-derived wing vein morphogenesis	7	0.859951	0.0544011	FBGN0011817, FBGN0003079, FBGN0002783, FBGN0003396, FBGN0000490, FBGN0042085, FBGN0004635	569	53	10996	2.55238	1	1	0.99788
GOTERM_BP_DIRECT	GO:0046843~dorsal appendage formation	7	0.859951	0.0586566	FBGN0000490, FBGN0003870, FBGN0003483, FBGN0016031, FBGN0001308, FBGN0010303, FBGN0262114	569	54	10996	2.50511	1	1	0.99788
GOTERM_BP_DIRECT	GO:0006955~immune response	7	0.859951	0.0586566	FBGN0041205, FBGN0013983, FBGN0261560, FBGN0030695, FBGN0033212, FBGN0038928, FBGN0043903	569	54	10996	2.50511	1	1	0.99788
GOTERM_BP_DIRECT	GO:0006468~protein phosphorylation	21	2.57985	0.0590701	FBGN0037098, FBGN0015402, FBGN0016696, FBGN0036896, FBGN0039623, FBGN0010197, FBGN0019990, FBGN0262866, FBGN0027504, FBGN0044826, FBGN0004876, FBGN0002413, FBGN0011817, FBGN0004367, FBGN0024179, FBGN0283472, FBGN0000063, FBGN0031696, FBGN0031309, FBGN0010303, FBGN0010314	569	266	10996	1.52567	1	1	0.99788
GOTERM_BP_DIRECT	GO:0046529~imaginal disc fusion, thorax closure	4	0.4914	0.0627648	FBGN0001297, FBGN0029944, FBGN0020261, FBGN0010303	569	18	10996	4.29447	1	1	0.99788
GOTERM_BP_DIRECT	GO:0016573~histone acetylation	7	0.859951	0.0631055	FBGN0036374, FBGN0020306, FBGN0038870, FBGN0030891, FBGN0035766, FBGN0031604, FBGN0031876	569	55	10996	2.45956	1	1	0.99788
GOTERM_BP_DIRECT	GO:0048749~compound eye development	12	1.4742	0.0639011	FBGN0027598, FBGN0011817, FBGN0001297, FBGN0026313, FBGN0023518, FBGN0036340, FBGN0000097, FBGN0005683, FBGN0031872, FBGN0261986, FBGN0013764, FBGN0002932	569	127	10996	1.826	1	1	0.99788
GOTERM_BP_DIRECT	GO:0006606~protein import into nucleus	5	0.614251	0.0666487	FBGN0031456, FBGN0061200, FBGN0034118, FBGN0037924, FBGN0026207	569	30	10996	3.22086	1	1	0.99788
GOTERM_BP_DIRECT	GO:0007419~ventral cord development	9	1.10565	0.0678849	FBGN0025631, FBGN0024179, FBGN0025455, FBGN0015391, FBGN0038746, FBGN0035205, FBGN0041171, FBGN0002932, FBGN0004657	569	84	10996	2.07055	1	1	0.99788
GOTERM_BP_DIRECT	GO:0042023~DNA endoreduplication	4	0.4914	0.0717795	FBGN0030054, FBGN0262656, FBGN0015799, FBGN0041171	569	19	10996	4.06845	1	1	0.99788
GOTERM_BP_DIRECT	GO:0031647~regulation of protein stability	4	0.4914	0.0717795	FBGN0000352, FBGN0267487, FBGN0027568, FBGN0022764	569	19	10996	4.06845	1	1	0.99788
GOTERM_BP_DIRECT	GO:0006909~phagocytosis	17	2.08845	0.0746796	FBGN0039056, FBGN0033264, FBGN0040395, FBGN0010395, FBGN0265988, FBGN0260049, FBGN0033859, FBGN0030114, FBGN0004397, FBGN0000042, FBGN0283472, FBGN0042085, FBGN0011785, FBGN0032863, FBGN0013764, FBGN0053526, FBGN0034118	569	209	10996	1.5719	1	1	0.99788
GOTERM_BP_DIRECT	GO:0042384~cilium assembly	6	0.737101	0.0749226	FBGN0011020, FBGN0038221, FBGN0033212, FBGN0037614, FBGN0034446, FBGN0032119	569	44	10996	2.63525	1	1	0.99788
GOTERM_BP_DIRECT	GO:0008630~intrinsic apoptotic signaling pathway in response to DNA damage	3	0.36855	0.075347	FBGN0011706, FBGN0029131, FBGN0015799	569	9	10996	6.44171	1	1	0.99788
GOTERM_BP_DIRECT	GO:0046845~branched duct epithelial cell fate determination, open tracheal system	3	0.36855	0.075347	FBGN0003310, FBGN0000490, FBGN0004635	569	9	10996	6.44171	1	1	0.99788
GOTERM_BP_DIRECT	GO:0043044~ATP-dependent chromatin remodeling	3	0.36855	0.075347	FBGN0002783, FBGN0250786, FBGN0033636	569	9	10996	6.44171	1	1	0.99788
GOTERM_BP_DIRECT	GO:0010623~programmed cell death involved in cell development	3	0.36855	0.075347	FBGN0019972, FBGN0029131, FBGN0010501	569	9	10996	6.44171	1	1	0.99788
GOTERM_BP_DIRECT	GO:0016476~regulation of embryonic cell shape	4	0.4914	0.0813362	FBGN0004389, FBGN0024273, FBGN0003870, FBGN0011202	569	20	10996	3.86503	1	1	0.99788
GOTERM_BP_DIRECT	GO:0008361~regulation of cell size	4	0.4914	0.0813362	FBGN0261811, FBGN0283472, FBGN0262656, FBGN0015799	569	20	10996	3.86503	1	1	0.99788
GOTERM_BP_DIRECT	GO:0007391~dorsal closure	10	1.2285	0.0845106	FBGN0001297, FBGN0029944, FBGN0003388, FBGN0003396, FBGN0020261, FBGN0000490, FBGN0000097, FBGN0043364, FBGN0004657, FBGN0010303	569	103	10996	1.87623	1	1	0.99788
GOTERM_BP_DIRECT	GO:0016321~female meiosis chromosome segregation	7	0.859951	0.088242	FBGN0004655, FBGN0004367, FBGN0014133, FBGN0266916, FBGN0000063, FBGN0001987, FBGN0013765	569	60	10996	2.2546	1	1	0.99788
GOTERM_BP_DIRECT	GO:0008054~negative regulation of cyclin-dependent protein serine/threonine kinase by cyclin degradation	3	0.36855	0.0910523	FBGN0041171, FBGN0261786, FBGN0010314	569	10	10996	5.79754	1	1	0.99788
GOTERM_BP_DIRECT	GO:0006999~nuclear pore organization	3	0.36855	0.0910523	FBGN0039125, FBGN0061200, FBGN0027537	569	10	10996	5.79754	1	1	0.99788
GOTERM_BP_DIRECT	GO:0060438~trachea development	3	0.36855	0.0910523	FBGN0034718, FBGN0278604, FBGN0041171	569	10	10996	5.79754	1	1	0.99788
GOTERM_BP_DIRECT	GO:0007229~integrin-mediated signaling pathway	3	0.36855	0.0910523	FBGN0034880, FBGN0010395, FBGN0004657	569	10	10996	5.79754	1	1	0.99788
GOTERM_BP_DIRECT	GO:0008360~regulation of cell shape	10	1.2285	0.0926576	FBGN0004367, FBGN0016696, FBGN0000490, FBGN0025455, FBGN0003870, FBGN0011785, FBGN0261556, FBGN0027504, FBGN0004657, FBGN0002413	569	105	10996	1.84049	1	1	0.99788
GOTERM_BP_DIRECT	GO:0001666~response to hypoxia	5	0.614251	0.096251	FBGN0033188, FBGN0000063, FBGN0263316, FBGN0010651, FBGN0001224	569	34	10996	2.84193	1	1	0.99788
Cellular component
Category	Term	Count	%	PValue	Genes	List Total	Pop Hits	Pop Total	Fold Enrichment	Bonferroni	Benjamini	FDR
GOTERM_CC_DIRECT	GO:0005634~nucleus	149	18.3047	1.74878e-07	FBGN0014861, FBGN0037584, FBGN0036374, FBGN0041205, FBGN0260817, FBGN0033540, FBGN0033661, FBGN0037344, FBGN0022764, FBGN0015391, FBGN0004655, FBGN0025874, FBGN0050169, FBGN0037504, FBGN0036812, FBGN0015799, FBGN0035690, FBGN0040765, FBGN0035213, FBGN0061200, FBGN0263933, FBGN0029825, FBGN0003459, FBGN0002525, FBGN0259152, FBGN0263490, FBGN0031377, FBGN0030320, FBGN0013764, FBGN0041171, FBGN00866…	551	1832	10026	1.47992	5.91071e-05	5.91088e-05	5.82344e-05
GOTERM_CC_DIRECT	GO:0005730~nucleolus	27	3.31695	1.75669e-06	FBGN0032298, FBGN0028707, FBGN0039182, FBGN0001206, FBGN0053230, FBGN0015393, FBGN0004858, FBGN0029755, FBGN0010926, FBGN0035524, FBGN0034734, FBGN0039828, FBGN0030833, FBGN0010292, FBGN0037137, FBGN0259937, FBGN0004924, FBGN0003459, FBGN0023527, FBGN0037073, FBGN0032408, FBGN0032925, FBGN0004860, FBGN0030067, FBGN0266581, FBGN0038746, FBGN0026196	551	170	10026	2.88995	0.000593584	0.00029688	0.000292488
GOTERM_CC_DIRECT	GO:0032040~small-subunit processome	9	1.10565	0.000319254	FBGN0038597, FBGN0029755, FBGN0010926, FBGN0038964, FBGN0039182, FBGN0015393, FBGN0026196, FBGN0033557, FBGN0034734	551	33	10026	4.96255	0.102305	0.0359693	0.0354372
GOTERM_CC_DIRECT	GO:0005737~cytoplasm	113	13.8821	0.000989573	FBGN0041205, FBGN0260817, FBGN0033540, FBGN0015391, FBGN0001308, FBGN0022768, FBGN0001301, FBGN0003321, FBGN0264694, FBGN0025874, FBGN0028343, FBGN0031003, FBGN0027493, FBGN0010303, FBGN0030833, FBGN0039013, FBGN0039254, FBGN0260780, FBGN0002525, FBGN0004389, FBGN0026313, FBGN0011742, FBGN0038206, FBGN0011570, FBGN0039386, FBGN0086698, FBGN0019972, FBGN0001404, FBGN0262732, FBGN0261243, FBGN00531…	551	1553	10026	1.32399	0.284405	0.0836189	0.0823819
GOTERM_CC_DIRECT	GO:0030687~preribosome, large subunit precursor	7	0.859951	0.0023791	FBGN0032408, FBGN0010770, FBGN0030067, FBGN0033661, FBGN0032298, FBGN0039828, FBGN0038617	551	26	10026	4.89893	0.552954	0.160827	0.158448
GOTERM_CC_DIRECT	GO:0005700~polytene chromosome	20	2.457	0.00459772	FBGN0023518, FBGN0039227, FBGN0022764, FBGN0001206, FBGN0004924, FBGN0263933, FBGN0003459, FBGN0026427, FBGN0004655, FBGN0003277, FBGN0026577, FBGN0025455, FBGN0003870, FBGN0005386, FBGN0030891, FBGN0000283, FBGN0010313, FBGN0042085, FBGN0033636, FBGN0033846	551	180	10026	2.02178	0.789361	0.243693	0.240088
GOTERM_CC_DIRECT	GO:0005813~centrosome	13	1.59705	0.00559071	FBGN0038221, FBGN0010342, FBGN0061200, FBGN0030241, FBGN0002525, FBGN0040208, FBGN0026432, FBGN0050169, FBGN0000063, FBGN0000283, FBGN0010313, FBGN0031696, FBGN0013765	551	95	10026	2.48998	0.849676	0.243693	0.240088
GOTERM_CC_DIRECT	GO:0035060~brahma complex	5	0.614251	0.00576789	FBGN0002783, FBGN0039227, FBGN0000042, FBGN0042085, FBGN0030093	551	14	10026	6.49857	0.858463	0.243693	0.240088
GOTERM_CC_DIRECT	GO:0005654~nucleoplasm	17	2.08845	0.00858107	FBGN0260747, FBGN0037720, FBGN0037137, FBGN0032298, FBGN0020389, FBGN0003459, FBGN0050183, FBGN0040658, FBGN0050022, FBGN0003321, FBGN0032925, FBGN0051352, FBGN0028411, FBGN0000097, FBGN0283472, FBGN0015799, FBGN0015229	551	151	10026	2.04856	0.945683	0.322267	0.3175
GOTERM_CC_DIRECT	GO:0031965~nuclear membrane	7	0.859951	0.00958394	FBGN0039125, FBGN0003321, FBGN0031456, FBGN0061200, FBGN0042177, FBGN0034447, FBGN0026207	551	34	10026	3.74624	0.961419	0.323937	0.319145
GOTERM_CC_DIRECT	GO:0070604~PBAF complex	4	0.4914	0.0107552	FBGN0002783, FBGN0039227, FBGN0042085, FBGN0030093	551	9	10026	8.08711	0.974138	0.330479	0.325591
GOTERM_CC_DIRECT	GO:0005886~plasma membrane	58	7.12531	0.0171632	FBGN0011672, FBGN0032298, FBGN0041243, FBGN0001987, FBGN0043903, FBGN0004657, FBGN0034718, FBGN0025631, FBGN0045443, FBGN0033422, FBGN0032731, FBGN0036341, FBGN0067864, FBGN0031571, FBGN0004108, FBGN0266720, FBGN0030766, FBGN0026313, FBGN0052579, FBGN0024179, FBGN0259111, FBGN0033313, FBGN0037315, FBGN0036501, FBGN0010651, FBGN0038206, FBGN0015229, FBGN0085442, FBGN0086698, FBGN0037960, FBGN02612…	551	786	10026	1.34271	0.997124	0.433784	0.427367
GOTERM_CC_DIRECT	GO:0005856~cytoskeleton	9	1.10565	0.0176587	FBGN0003475, FBGN0086698, FBGN0040299, FBGN0011202, FBGN0038206, FBGN0260049, FBGN0001301, FBGN0086384, FBGN0030877	551	61	10026	2.68466	0.997575	0.433784	0.427367
GOTERM_CC_DIRECT	GO:0017053~transcriptional repressor complex	5	0.614251	0.0179674	FBGN0003870, FBGN0027553, FBGN0022764, FBGN0260397, FBGN0263933	551	19	10026	4.78842	0.997819	0.433784	0.427367
GOTERM_CC_DIRECT	GO:0000785~chromatin	9	1.10565	0.0211242	FBGN0001234, FBGN0030994, FBGN0004860, FBGN0005386, FBGN0022764, FBGN0015391, FBGN0278604, FBGN0015799, FBGN0033846	551	63	10026	2.59943	0.999266	0.476	0.468958
GOTERM_CC_DIRECT	GO:0005657~replication fork	3	0.36855	0.0268894	FBGN0030931, FBGN0031540, FBGN0035150	551	5	10026	10.9176	0.9999	0.568039	0.559636
GOTERM_CC_DIRECT	GO:0005927~muscle tendon junction	4	0.4914	0.0380028	FBGN0033212, FBGN0032731, FBGN0004657, FBGN0035539	551	14	10026	5.19886	0.999998	0.62586	0.616602
GOTERM_CC_DIRECT	GO:0032039~integrator complex	4	0.4914	0.0380028	FBGN0035462, FBGN0034964, FBGN0026679, FBGN0039691	551	14	10026	5.19886	0.999998	0.62586	0.616602
GOTERM_CC_DIRECT	GO:0044613~nuclear pore central transport channel	3	0.36855	0.0388848	FBGN0061200, FBGN0034118, FBGN0037924	551	6	10026	9.098	0.999998	0.62586	0.616602
GOTERM_CC_DIRECT	GO:0031428~box C/D snoRNP complex	3	0.36855	0.0388848	FBGN0038964, FBGN0015393, FBGN0026196	551	6	10026	9.098	0.999998	0.62586	0.616602
GOTERM_CC_DIRECT	GO:0044615~nuclear pore nuclear basket	3	0.36855	0.0388848	FBGN0061200, FBGN0027537, FBGN0037924	551	6	10026	9.098	0.999998	0.62586	0.616602
GOTERM_CC_DIRECT	GO:0005635~nuclear envelope	7	0.859951	0.050166	FBGN0003321, FBGN0061200, FBGN0037894, FBGN0028411, FBGN0067864, FBGN0002525, FBGN0026207	551	49	10026	2.59943	1	0.770732	0.759331
GOTERM_CC_DIRECT	GO:0000792~heterochromatin	4	0.4914	0.0539315	FBGN0001206, FBGN0263755, FBGN0278604, FBGN0026427	551	16	10026	4.549	1	0.792558	0.780834
GOTERM_CC_DIRECT	GO:0005884~actin filament	5	0.614251	0.057727	FBGN0011570, FBGN0004389, FBGN0000042, FBGN0011742, FBGN0011202	551	27	10026	3.36963	1	0.812988	0.800962
GOTERM_CC_DIRECT	GO:0045177~apical part of cell	7	0.859951	0.0637807	FBGN0262937, FBGN0032363, FBGN0262127, FBGN0011202, FBGN0004635, FBGN0004876, FBGN0250871	551	52	10026	2.44946	1	0.844985	0.832485
GOTERM_CC_DIRECT	GO:0008305~integrin complex	3	0.36855	0.0674988	FBGN0034880, FBGN0010395, FBGN0004657	551	8	10026	6.8235	1	0.844985	0.832485
GOTERM_CC_DIRECT	GO:0032783~ELL-EAF complex	3	0.36855	0.0674988	FBGN0038860, FBGN0025455, FBGN0026441	551	8	10026	6.8235	1	0.844985	0.832485
GOTERM_CC_DIRECT	GO:0008023~transcription elongation factor complex	4	0.4914	0.0827596	FBGN0038860, FBGN0025455, FBGN0039066, FBGN0031604	551	19	10026	3.83074	1	0.986526	0.971932
GOTERM_CC_DIRECT	GO:0005703~polytene chromosome puff	6	0.737101	0.0846428	FBGN0003277, FBGN0023518, FBGN0025455, FBGN0030891, FBGN0250786, FBGN0004924	551	43	10026	2.53898	1	0.986526	0.971932
KEGG Pathway
Category	Term	Count	%	PValue	Genes	List Total	Pop Hits	Pop Total	Fold Enrichment	Bonferroni	Benjamini	FDR
KEGG_PATHWAY	dme03020:RNA polymerase	6	0.737101	0.013514	FBGN0028402, FBGN0003277, FBGN0030687, FBGN0003278, FBGN0262955, FBGN0019938	139	29	2737	4.07393	0.587039	0.532801	0.532801
KEGG_PATHWAY	dme00240:Pyrimidine metabolism	10	1.2285	0.0163939	FBGN0028402, FBGN0003277, FBGN0039464, FBGN0030687, FBGN0003278, FBGN0262955, FBGN0263600, FBGN0011762, FBGN0019938, FBGN0033538	139	79	2737	2.49249	0.658509	0.532801	0.532801
KEGG_PATHWAY	dme00230:Purine metabolism	13	1.59705	0.0316105	FBGN0262955, FBGN0010197, FBGN0263600, FBGN0020389, FBGN0004901, FBGN0028402, FBGN0003277, FBGN0030687, FBGN0003278, FBGN0027493, FBGN0011762, FBGN0019938, FBGN0033538	139	132	2737	1.93923	0.876048	0.684895	0.684895
KEGG_PATHWAY	dme03013:RNA transport	13	1.59705	0.0446157	FBGN0039125, FBGN0036340, FBGN0033264, FBGN0010660, FBGN0061200, FBGN0023512, FBGN0027537, FBGN0026207, FBGN0003321, FBGN0261560, FBGN0028411, FBGN0034118, FBGN0037924	139	139	2737	1.84157	0.948527	0.725006	0.725006
KEGG_PATHWAY	dme00920:Sulfur metabolism	3	0.36855	0.0578664	FBGN0050022, FBGN0020389, FBGN0082585	139	8	2737	7.38399	0.979236	0.749886	0.749886
KEGG_PATHWAY	dme04391:Hippo signaling pathway - fly	7	0.859951	0.0692203	FBGN0000042, FBGN0067864, FBGN0262127, FBGN0011202, FBGN0262656, FBGN0086384, FBGN0002413	139	58	2737	2.37646	0.990558	0.749886	0.749886

## Sheet: Aged FHV48h down specific
Table S9.	GO analysis of downregulated genes specific to Aged FHV 48h
Biological process
Category	Term	Count	%	PValue	Genes	List Total	Pop Hits	Pop Total	Fold Enrichment	Bonferroni	Benjamini	FDR
GOTERM_BP_DIRECT	GO:0032504~multicellular organism reproduction	82	10.5943	8.41344e-50	FBGN0034152, FBGN0039485, FBGN0259949, FBGN0020509, FBGN0034154, FBGN0032494, FBGN0036970, FBGN0011670, FBGN0051493, FBGN0267327, FBGN0039483, FBGN0261060, FBGN0028986, FBGN0038918, FBGN0000094, FBGN0050488, FBGN0054002, FBGN0034753, FBGN0051418, FBGN0032853, FBGN0259956, FBGN0259958, FBGN0015583, FBGN0037038, FBGN0259959, FBGN0015585, FBGN0037036, FBGN0015584, FBGN0004629, FBGN0054034, FBGN00516…	461	258	10996	7.58103	5.03965e-47	5.03965e-47	4.98917e-47
GOTERM_BP_DIRECT	GO:0055114~oxidation-reduction process	50	6.45995	2.59902e-11	FBGN0013772, FBGN0015033, FBGN0002719, FBGN0036698, FBGN0036211, FBGN0033981, FBGN0030593, FBGN0054041, FBGN0038194, FBGN0051014, FBGN0038918, FBGN0031925, FBGN0052068, FBGN0030594, FBGN0033543, FBGN0036857, FBGN0039697, FBGN0012036, FBGN0039099, FBGN0038681, FBGN0022359, FBGN0001112, FBGN0051524, FBGN0031418, FBGN0031417, FBGN0036824, FBGN0086254, FBGN0039782, FBGN0036796, FBGN0032350, FBGN00369…	461	412	10996	2.89472	1.55681e-08	7.78406e-09	7.70609e-09
GOTERM_BP_DIRECT	GO:0006508~proteolysis	48	6.20155	2.93351e-08	FBGN0038014, FBGN0038431, FBGN0036015, FBGN0016122, FBGN0038136, FBGN0023479, FBGN0030777, FBGN0030776, FBGN0030774, FBGN0030773, FBGN0039628, FBGN0011556, FBGN0011555, FBGN0031409, FBGN0011834, FBGN0036022, FBGN0040341, FBGN0037038, FBGN0037036, FBGN0039798, FBGN0039599, FBGN0039073, FBGN0263234, FBGN0263235, FBGN0038481, FBGN0003356, FBGN0053127, FBGN0030688, FBGN0032507, FBGN0051269, FBGN02628…	461	475	10996	2.41036	1.75715e-05	5.85723e-06	5.79856e-06
GOTERM_BP_DIRECT	GO:0005975~carbohydrate metabolic process	16	2.06718	3.26899e-05	FBGN0032192, FBGN0053080, FBGN0020506, FBGN0033296, FBGN0033297, FBGN0040321, FBGN0064237, FBGN0261575, FBGN0050360, FBGN0262782, FBGN0002569, FBGN0053138, FBGN0051148, FBGN0000079, FBGN0002570, FBGN0030239	461	106	10996	3.60038	0.0193911	0.00489531	0.00484628
GOTERM_BP_DIRECT	GO:0007610~behavior	5	0.645995	9.56765e-05	FBGN0015583, FBGN0020509, FBGN0015585, FBGN0015584, FBGN0002863	461	7	10996	17.0375	0.0557015	0.0114621	0.0113472
GOTERM_BP_DIRECT	GO:0046693~sperm storage	6	0.775194	0.000122056	FBGN0001112, FBGN0015583, FBGN0050488, FBGN0000592, FBGN0037036, FBGN0039599	461	13	10996	11.0088	0.070507	0.0121853	0.0120632
GOTERM_BP_DIRECT	GO:0007606~sensory perception of chemical stimulus	13	1.67959	0.000430836	FBGN0034470, FBGN0043534, FBGN0043533, FBGN0043530, FBGN0020277, FBGN0043539, FBGN0261291, FBGN0030103, FBGN0034509, FBGN0261293, FBGN0034468, FBGN0034768, FBGN0051438	461	92	10996	3.37046	0.227502	0.0368672	0.0364979
GOTERM_BP_DIRECT	GO:0007623~circadian rhythm	10	1.29199	0.00102255	FBGN0037288, FBGN0025680, FBGN0039485, FBGN0032494, FBGN0044048, FBGN0051189, FBGN0027586, FBGN0039483, FBGN0051207, FBGN0031538	461	62	10996	3.84718	0.458181	0.0765637	0.0757968
GOTERM_BP_DIRECT	GO:0006520~cellular amino acid metabolic process	6	0.775194	0.00332554	FBGN0001124, FBGN0039051, FBGN0039094, FBGN0001125, FBGN0036208, FBGN0030558	461	25	10996	5.7246	0.864029	0.200554	0.198545
GOTERM_BP_DIRECT	GO:0009072~aromatic amino acid family metabolic process	4	0.516796	0.00347975	FBGN0036992, FBGN0037697, FBGN0001208, FBGN0030558	461	8	10996	11.9262	0.876066	0.200554	0.198545
GOTERM_BP_DIRECT	GO:0045434~negative regulation of female receptivity, post-mating	5	0.645995	0.00368296	FBGN0050488, FBGN0003034, FBGN0037036, FBGN0039599, FBGN0267327	461	16	10996	7.4539	0.890317	0.200554	0.198545
GOTERM_BP_DIRECT	GO:0006567~threonine catabolic process	3	0.387597	0.00509366	FBGN0037684, FBGN0039094, FBGN0036208	461	3	10996	23.8525	0.953061	0.254258	0.251711
GOTERM_BP_DIRECT	GO:0006629~lipid metabolic process	10	1.29199	0.00603473	FBGN0038069, FBGN0038067, FBGN0265267, FBGN0085476, FBGN0250847, FBGN0036837, FBGN0032029, FBGN0051091, FBGN0033999, FBGN0031976	461	80	10996	2.98156	0.973371	0.267049	0.264374
GOTERM_BP_DIRECT	GO:0016042~lipid catabolic process	8	1.03359	0.00624154	FBGN0038069, FBGN0038067, FBGN0039475, FBGN0085476, FBGN0030828, FBGN0051091, FBGN0033999, FBGN0031976	461	53	10996	3.60038	0.976492	0.267049	0.264374
GOTERM_BP_DIRECT	GO:0006012~galactose metabolic process	3	0.387597	0.00990537	FBGN0001089, FBGN0263199, FBGN0263200	461	4	10996	17.8894	0.997428	0.370832	0.367118
GOTERM_BP_DIRECT	GO:0006559~L-phenylalanine catabolic process	3	0.387597	0.00990537	FBGN0040211, FBGN0037697, FBGN0001208	461	4	10996	17.8894	0.997428	0.370832	0.367118
GOTERM_BP_DIRECT	GO:0006123~mitochondrial electron transport, cytochrome c to oxygen	4	0.516796	0.012065	FBGN0040773, FBGN0019624, FBGN0040529, FBGN0015031	461	12	10996	7.95083	0.999304	0.414632	0.410478
GOTERM_BP_DIRECT	GO:0006749~glutathione metabolic process	7	0.904393	0.013015	FBGN0033381, FBGN0063495, FBGN0010044, FBGN0010043, FBGN0030484, FBGN0037697, FBGN0027590	461	47	10996	3.5525	0.999609	0.414632	0.410478
GOTERM_BP_DIRECT	GO:0030431~sleep	12	1.55039	0.0131519	FBGN0036022, FBGN0031305, FBGN0013674, FBGN0000079, FBGN0027348, FBGN0031914, FBGN0038733, FBGN0002719, FBGN0005585, FBGN0044048, FBGN0016122, FBGN0000477	461	122	10996	2.34615	0.99964	0.414632	0.410478
GOTERM_BP_DIRECT	GO:0006120~mitochondrial electron transport, NADH to ubiquinone	6	0.775194	0.0181091	FBGN0031228, FBGN0021967, FBGN0025839, FBGN0033961, FBGN0034645, FBGN0052230	461	37	10996	3.86797	0.999982	0.516505	0.511331
GOTERM_BP_DIRECT	GO:0006090~pyruvate metabolic process	4	0.516796	0.0187612	FBGN0038662, FBGN0012036, FBGN0267385, FBGN0051075	461	14	10996	6.815	0.999988	0.516505	0.511331
GOTERM_BP_DIRECT	GO:0008152~metabolic process	13	1.67959	0.0193842	FBGN0032161, FBGN0035044, FBGN0040253, FBGN0038733, FBGN0019982, FBGN0004888, FBGN0015808, FBGN0038858, FBGN0036768, FBGN0035734, FBGN0038734, FBGN0037607, FBGN0016715	461	146	10996	2.12385	0.999992	0.516505	0.511331
GOTERM_BP_DIRECT	GO:0006810~transport	11	1.42119	0.0198324	FBGN0034470, FBGN0031814, FBGN0043534, FBGN0083956, FBGN0031914, FBGN0034509, FBGN0020277, FBGN0034468, FBGN0053966, FBGN0061492, FBGN0037913	461	113	10996	2.32192	0.999994	0.516505	0.511331
GOTERM_BP_DIRECT	GO:0045454~cell redox homeostasis	7	0.904393	0.0207387	FBGN0014002, FBGN0038918, FBGN0037498, FBGN0036745, FBGN0033520, FBGN0033521, FBGN0036820	461	52	10996	3.21091	0.999996	0.517603	0.512418
GOTERM_BP_DIRECT	GO:0009116~nucleoside metabolic process	4	0.516796	0.0227376	FBGN0000109, FBGN0041194, FBGN0035348, FBGN0036030	461	15	10996	6.36067	0.999999	0.544794	0.539337
GOTERM_BP_DIRECT	GO:0006096~glycolytic process	5	0.645995	0.0247287	FBGN0001187, FBGN0250906, FBGN0267385, FBGN0014869, FBGN0001091	461	27	10996	4.41713	1	0.56971	0.564004
GOTERM_BP_DIRECT	GO:0006006~glucose metabolic process	4	0.516796	0.0271349	FBGN0001112, FBGN0043783, FBGN0003076, FBGN0001091	461	16	10996	5.96312	1	0.601992	0.595962
GOTERM_BP_DIRECT	GO:0032367~intracellular cholesterol transport	3	0.387597	0.0318886	FBGN0039800, FBGN0039801, FBGN0039154	461	7	10996	10.2225	1	0.682189	0.675356
GOTERM_BP_DIRECT	GO:0015918~sterol transport	3	0.387597	0.0517296	FBGN0039800, FBGN0039801, FBGN0039154	461	9	10996	7.95083	1	1	0.991639
GOTERM_BP_DIRECT	GO:0042593~glucose homeostasis	3	0.387597	0.0517296	FBGN0034140, FBGN0038984, FBGN0023479	461	9	10996	7.95083	1	1	0.991639
GOTERM_BP_DIRECT	GO:0002181~cytoplasmic translation	9	1.16279	0.0578843	FBGN0015521, FBGN0010198, FBGN0028697, FBGN0003274, FBGN0010411, FBGN0002579, FBGN0023170, FBGN0016726, FBGN0066084	461	100	10996	2.14672	1	1	0.991639
GOTERM_BP_DIRECT	GO:0016267~O-glycan processing, core 1	3	0.387597	0.062911	FBGN0031466, FBGN0054057, FBGN0085481	461	10	10996	7.15575	1	1	0.991639
GOTERM_BP_DIRECT	GO:0046701~insecticide catabolic process	4	0.516796	0.0692941	FBGN0013772, FBGN0033981, FBGN0031182, FBGN0038194	461	23	10996	4.14826	1	1	0.991639
GOTERM_BP_DIRECT	GO:0048042~regulation of post-mating oviposition	3	0.387597	0.0748168	FBGN0003034, FBGN0029709, FBGN0061492	461	11	10996	6.50523	1	1	0.991639
GOTERM_BP_DIRECT	GO:0045455~ecdysteroid metabolic process	3	0.387597	0.0748168	FBGN0030588, FBGN0030594, FBGN0030593	461	11	10996	6.50523	1	1	0.991639
GOTERM_BP_DIRECT	GO:0046692~sperm competition	4	0.516796	0.0768339	FBGN0015583, FBGN0020509, FBGN0000592, FBGN0015584	461	24	10996	3.97542	1	1	0.991639
GOTERM_BP_DIRECT	GO:0006531~aspartate metabolic process	2	0.258398	0.0819204	FBGN0001124, FBGN0001125	461	2	10996	23.8525	1	1	0.991639
GOTERM_BP_DIRECT	GO:0006069~ethanol oxidation	2	0.258398	0.0819204	FBGN0000055, FBGN0011768	461	2	10996	23.8525	1	1	0.991639
GOTERM_BP_DIRECT	GO:0043152~induction of bacterial agglutination	2	0.258398	0.0819204	FBGN0016675, FBGN0262357	461	2	10996	23.8525	1	1	0.991639
GOTERM_BP_DIRECT	GO:0050830~defense response to Gram-positive bacterium	6	0.775194	0.0840018	FBGN0030774, FBGN0040660, FBGN0243514, FBGN0000094, FBGN0034328, FBGN0034538	461	56	10996	2.55562	1	1	0.991639
GOTERM_BP_DIRECT	GO:0042381~hemolymph coagulation	3	0.387597	0.0873672	FBGN0039800, FBGN0039798, FBGN0039801	461	12	10996	5.96312	1	1	0.991639
GOTERM_BP_DIRECT	GO:0006979~response to oxidative stress	8	1.03359	0.0901965	FBGN0052446, FBGN0003462, FBGN0086711, FBGN0014391, FBGN0033521, FBGN0039802, FBGN0028396, FBGN0034415	461	92	10996	2.07413	1	1	0.991639
GOTERM_BP_DIRECT	GO:0015992~proton transport	4	0.516796	0.0929278	FBGN0013672, FBGN0035032, FBGN0016691, FBGN0014391	461	26	10996	3.66961	1	1	0.991639
Cellular component
Category	Term	Count	%	PValue	Genes	List Total	Pop Hits	Pop Total	Fold Enrichment	Bonferroni	Benjamini	FDR
GOTERM_CC_DIRECT	GO:0005615~extracellular space	106	13.6951	2.13094e-39	FBGN0043530, FBGN0024293, FBGN0004629, FBGN0032122, FBGN0034415, FBGN0043533, FBGN0038506, FBGN0043539, FBGN0051207, FBGN0051438, FBGN0038014, FBGN0031097, FBGN0050042, FBGN0034152, FBGN0036110, FBGN0034229, FBGN0034154, FBGN0261060, FBGN0051832, FBGN0011822, FBGN0003034, FBGN0032494, FBGN0033165, FBGN0038172, FBGN0033167, FBGN0044048, FBGN0037036, FBGN0037038, FBGN0031538, FBGN0051418, FBGN00409…	426	587	10026	4.24997	2.59975e-37	2.59975e-37	2.4535e-36
GOTERM_CC_DIRECT	GO:0005576~extracellular region	65	8.39793	1.15942e-13	FBGN0043534, FBGN0043530, FBGN0040736, FBGN0043533, FBGN0016675, FBGN0043539, FBGN0002856, FBGN0032853, FBGN0051438, FBGN0267327, FBGN0028526, FBGN0040321, FBGN0034229, FBGN0011670, FBGN0085476, FBGN0022355, FBGN0034328, FBGN0031976, FBGN0250847, FBGN0020506, FBGN0003034, FBGN0036970, FBGN0037650, FBGN0027611, FBGN0034468, FBGN0039599, FBGN0053533, FBGN0052201, FBGN0000594, FBGN0040687, FBGN00000…	426	556	10026	2.75142	1.41407e-11	7.07034e-12	1.33449e-10
GOTERM_CC_DIRECT	GO:0005811~lipid particle	28	3.61757	4.55771e-05	FBGN0012036, FBGN0029994, FBGN0001091, FBGN0005585, FBGN0263120, FBGN0033246, FBGN0016691, FBGN0021795, FBGN0053129, FBGN0035032, FBGN0283427, FBGN0267385, FBGN0030607, FBGN0039697, FBGN0040793, FBGN0262782, FBGN0019624, FBGN0014002, FBGN0000055, FBGN0001125, FBGN0015031, FBGN0037607, FBGN0035811, FBGN0034753, FBGN0001208, FBGN0021765, FBGN0002562, FBGN0015808	426	277	10026	2.37901	0.00554511	0.0018518	0.0524634
GOTERM_CC_DIRECT	GO:0005751~mitochondrial respiratory chain complex IV	5	0.645995	0.00227029	FBGN0040773, FBGN0015031, FBGN0052230, FBGN0019624, FBGN0040529	426	14	10026	8.40543	0.242166	0.0669744	2.58297
GOTERM_CC_DIRECT	GO:0005747~mitochondrial respiratory chain complex I	8	1.03359	0.00299063	FBGN0031228, FBGN0034576, FBGN0034645, FBGN0021967, FBGN0052230, FBGN0085468, FBGN0025839, FBGN0033961	426	46	10026	4.09308	0.306083	0.0704742	3.38969
GOTERM_CC_DIRECT	GO:0005739~mitochondrion	32	4.13437	0.0116264	FBGN0012036, FBGN0021967, FBGN0003312, FBGN0027945, FBGN0032161, FBGN0033961, FBGN0016691, FBGN0029854, FBGN0040529, FBGN0013672, FBGN0036211, FBGN0038662, FBGN0013676, FBGN0035032, FBGN0039697, FBGN0262782, FBGN0019624, FBGN0004888, FBGN0036824, FBGN0001125, FBGN0039802, FBGN0085483, FBGN0036208, FBGN0015031, FBGN0069923, FBGN0035811, FBGN0029823, FBGN0021765, FBGN0015808, FBGN0023535, FBGN00406…	426	477	10026	1.57888	0.759907	0.21163	12.5975
GOTERM_CC_DIRECT	GO:0005743~mitochondrial inner membrane	11	1.42119	0.0214583	FBGN0038662, FBGN0019830, FBGN0013676, FBGN0014391, FBGN0025839, FBGN0260008, FBGN0013674, FBGN0016691, FBGN0019624, FBGN0013675, FBGN0013672	426	113	10026	2.29104	0.929094	0.314809	22.1007
GOTERM_CC_DIRECT	GO:0005783~endoplasmic reticulum	17	2.19638	0.0354294	FBGN0036796, FBGN0262801, FBGN0036795, FBGN0036745, FBGN0085374, FBGN0005585, FBGN0263120, FBGN0004132, FBGN0037498, FBGN0051524, FBGN0021795, FBGN0052201, FBGN0039782, FBGN0051014, FBGN0051021, FBGN0054041, FBGN0014002	426	230	10026	1.73956	0.987733	0.423109	33.9874
GOTERM_CC_DIRECT	GO:0005777~peroxisome	9	1.16279	0.0366657	FBGN0033464, FBGN0039131, FBGN0038665, FBGN0015808, FBGN0043792, FBGN0262782, FBGN0001124, FBGN0033543, FBGN0003462	426	90	10026	2.35352	0.98951	0.397318	34.955
GOTERM_CC_DIRECT	GO:0031090~organelle membrane	8	1.03359	0.0496246	FBGN0031925, FBGN0031182, FBGN0015033, FBGN0035790, FBGN0033981, FBGN0039172, FBGN0013772, FBGN0038194	426	79	10026	2.38331	0.99799	0.462571	44.3465
GOTERM_CC_DIRECT	GO:0031430~M band	3	0.387597	0.0529712	FBGN0250906, FBGN0001091, FBGN0014869	426	9	10026	7.84507	0.998693	0.453177	46.5616
GOTERM_CC_DIRECT	GO:0012505~endomembrane system	15	1.93798	0.0551725	FBGN0052069, FBGN0262801, FBGN0036745, FBGN0011336, FBGN0005585, FBGN0037312, FBGN0004132, FBGN0032015, FBGN0034753, FBGN0036211, FBGN0021795, FBGN0053129, FBGN0029709, FBGN0013772, FBGN0014002	426	206	10026	1.71373	0.999016	0.438412	47.9744
GOTERM_CC_DIRECT	GO:0005840~ribosome	9	1.16279	0.0558597	FBGN0023170, FBGN0002579, FBGN0028697, FBGN0003274, FBGN0083983, FBGN0016726, FBGN0015521, FBGN0051664, FBGN0010198	426	98	10026	2.1614	0.9991	0.416921	48.4084
GOTERM_CC_DIRECT	GO:0005750~mitochondrial respiratory chain complex III	3	0.387597	0.0765588	FBGN0260008, FBGN0034245, FBGN0011227	426	11	10026	6.41869	0.99994	0.500464	60.03
GOTERM_CC_DIRECT	GO:0022625~cytosolic large ribosomal subunit	6	0.775194	0.0983784	FBGN0066084, FBGN0023170, FBGN0002579, FBGN0028697, FBGN0003274, FBGN0016726	426	58	10026	2.43468	0.999997	0.569277	69.6496
KEGG Pathway
Category	Term	Count	%	PValue	Genes	List Total	Pop Hits	Pop Total	Fold Enrichment	Bonferroni	Benjamini	FDR
KEGG_PATHWAY	dme01100:Metabolic pathways	110	14.2119	3.83392e-19	FBGN0051075, FBGN0002719, FBGN0028663, FBGN0011227, FBGN0040773, FBGN0263911, FBGN0039378, FBGN0019624, FBGN0035348, FBGN0022359, FBGN0011336, FBGN0035811, FBGN0038172, FBGN0250906, FBGN0026565, FBGN0085468, FBGN0026755, FBGN0012034, FBGN0040253, FBGN0012036, FBGN0030594, FBGN0036857, FBGN0262512, FBGN0033246, FBGN0033961, FBGN0032015, FBGN0034576, FBGN0267385, FBGN0001112, FBGN0002570, FBGN00048…	167	901	2737	2.0009	2.76042e-17	2.76042e-17	3.99064e-16
KEGG_PATHWAY	dme01130:Biosynthesis of antibiotics	32	4.13437	3.71787e-08	FBGN0012034, FBGN0051075, FBGN0012036, FBGN0037684, FBGN0043783, FBGN0030558, FBGN0001091, FBGN0036857, FBGN0027945, FBGN0003076, FBGN0267385, FBGN0262782, FBGN0004888, FBGN0000053, FBGN0001125, FBGN0000055, FBGN0001187, FBGN0011768, FBGN0037607, FBGN0030239, FBGN0039094, FBGN0014869, FBGN0035811, FBGN0029823, FBGN0021765, FBGN0032350, FBGN0041194, FBGN0036030, FBGN0250906, FBGN0023535, FBGN00265…	167	180	2737	2.91364	2.67686e-06	1.33843e-06	3.86984e-05
KEGG_PATHWAY	dme00190:Oxidative phosphorylation	26	3.35917	3.98691e-07	FBGN0038613, FBGN0021967, FBGN0015031, FBGN0262512, FBGN0016687, FBGN0033961, FBGN0013674, FBGN0013675, FBGN0016691, FBGN0040529, FBGN0028663, FBGN0011227, FBGN0013672, FBGN0034576, FBGN0040773, FBGN0031228, FBGN0263911, FBGN0035032, FBGN0013676, FBGN0014391, FBGN0034645, FBGN0085468, FBGN0052230, FBGN0025839, FBGN0034245, FBGN0019624	167	139	2737	3.06561	2.87054e-05	9.56855e-06	0.000414988
KEGG_PATHWAY	dme01230:Biosynthesis of amino acids	17	2.19638	4.93336e-07	FBGN0037684, FBGN0001125, FBGN0030558, FBGN0001091, FBGN0039094, FBGN0037607, FBGN0005278, FBGN0014869, FBGN0029823, FBGN0001208, FBGN0267385, FBGN0032350, FBGN0036030, FBGN0250906, FBGN0023535, FBGN0026565, FBGN0001124	167	63	2737	4.42249	3.55195e-05	8.88e-06	0.0005135
KEGG_PATHWAY	dme00052:Galactose metabolism	12	1.55039	2.48391e-06	FBGN0001089, FBGN0003076, FBGN0027552, FBGN0086254, FBGN0043783, FBGN0263200, FBGN0001187, FBGN0033297, FBGN0002569, FBGN0033296, FBGN0002570, FBGN0261575	167	34	2737	5.78443	0.000178826	3.57677e-05	0.00258541
KEGG_PATHWAY	dme00260:Glycine, serine and threonine metabolism	10	1.29199	1.62704e-05	FBGN0029823, FBGN0037684, FBGN0032350, FBGN0001112, FBGN0036208, FBGN0030594, FBGN0036857, FBGN0039094, FBGN0027945, FBGN0014869	167	27	2737	6.07008	0.00117079	0.000195228	0.0169342
KEGG_PATHWAY	dme00350:Tyrosine metabolism	8	1.03359	1.91398e-05	FBGN0000055, FBGN0001125, FBGN0037697, FBGN0040211, FBGN0030558, FBGN0011768, FBGN0001124, FBGN0036992	167	16	2737	8.19461	0.00137713	0.000196849	0.0199204
KEGG_PATHWAY	dme00010:Glycolysis / Gluconeogenesis	13	1.67959	5.01606e-05	FBGN0012034, FBGN0051075, FBGN0012036, FBGN0000055, FBGN0043783, FBGN0001187, FBGN0011768, FBGN0001091, FBGN0036857, FBGN0014869, FBGN0267385, FBGN0003076, FBGN0250906	167	53	2737	4.02	0.00360514	0.000451355	0.0521987
KEGG_PATHWAY	dme00500:Starch and sucrose metabolism	10	1.29199	5.664e-05	FBGN0053138, FBGN0003076, FBGN0020506, FBGN0001187, FBGN0000079, FBGN0033297, FBGN0002569, FBGN0033296, FBGN0002570, FBGN0261575	167	31	2737	5.28685	0.00406989	0.00045303	0.0589396
KEGG_PATHWAY	dme01200:Carbon metabolism	19	2.45478	7.38106e-05	FBGN0012034, FBGN0037684, FBGN0001125, FBGN0002719, FBGN0001187, FBGN0001091, FBGN0011768, FBGN0030239, FBGN0037607, FBGN0014869, FBGN0035811, FBGN0029823, FBGN0267385, FBGN0032350, FBGN0036030, FBGN0250906, FBGN0001124, FBGN0262782, FBGN0004888	167	110	2737	2.83087	0.00530046	0.000531315	0.0768011
KEGG_PATHWAY	dme00071:Fatty acid degradation	9	1.16279	0.000286721	FBGN0051075, FBGN0012036, FBGN0036824, FBGN0000055, FBGN0036857, FBGN0011768, FBGN0263120, FBGN0035811, FBGN0027348	167	30	2737	4.91677	0.0204352	0.00187523	0.298039
KEGG_PATHWAY	dme00330:Arginine and proline metabolism	11	1.42119	0.00031141	FBGN0052201, FBGN0051075, FBGN0012036, FBGN0039782, FBGN0051014, FBGN0001125, FBGN0085374, FBGN0023535, FBGN0036857, FBGN0001124, FBGN0051524	167	46	2737	3.91916	0.0221754	0.001867	0.323665
KEGG_PATHWAY	dme00360:Phenylalanine metabolism	5	0.645995	0.000395698	FBGN0001208, FBGN0001125, FBGN0030558, FBGN0001124, FBGN0036992	167	7	2737	11.7066	0.0280937	0.00218959	0.411107
KEGG_PATHWAY	dme00400:Phenylalanine, tyrosine and tryptophan biosynthesis	4	0.516796	0.000838071	FBGN0001208, FBGN0001125, FBGN0030558, FBGN0001124	167	4	2737	16.3892	0.0585805	0.0043026	0.868897
KEGG_PATHWAY	dme00980:Metabolism of xenobiotics by cytochrome P450	12	1.55039	0.000860809	FBGN0033381, FBGN0031418, FBGN0040253, FBGN0063495, FBGN0027590, FBGN0000055, FBGN0026314, FBGN0011768, FBGN0010044, FBGN0030484, FBGN0026755, FBGN0010043	167	61	2737	3.22411	0.0601218	0.00412513	0.892377
KEGG_PATHWAY	dme00982:Drug metabolism - cytochrome P450	11	1.42119	0.00311671	FBGN0033381, FBGN0040253, FBGN0063495, FBGN0027590, FBGN0000055, FBGN0026314, FBGN0011768, FBGN0010044, FBGN0030484, FBGN0026755, FBGN0010043	167	61	2737	2.95543	0.201287	0.0139489	3.19696
KEGG_PATHWAY	dme00270:Cysteine and methionine metabolism	7	0.904393	0.00378534	FBGN0052068, FBGN0001125, FBGN0032726, FBGN0030558, FBGN0262782, FBGN0001124, FBGN0005278	167	26	2737	4.41248	0.238954	0.0159341	3.87064
KEGG_PATHWAY	dme00981:Insect hormone biosynthesis	5	0.645995	0.0105129	FBGN0034405, FBGN0034406, FBGN0003312, FBGN0010053, FBGN0030332	167	15	2737	5.46307	0.53277	0.0413929	10.417
KEGG_PATHWAY	dme00040:Pentose and glucuronate interconversions	8	1.03359	0.0134068	FBGN0031418, FBGN0040253, FBGN0027552, FBGN0086254, FBGN0022359, FBGN0038463, FBGN0026314, FBGN0026755	167	43	2737	3.04916	0.621606	0.0498624	13.107
KEGG_PATHWAY	dme00061:Fatty acid biosynthesis	4	0.516796	0.0140295	FBGN0283427, FBGN0263120, FBGN0033246, FBGN0027348	167	9	2737	7.2841	0.638423	0.0495921	13.6762
KEGG_PATHWAY	dme00620:Pyruvate metabolism	8	1.03359	0.0170524	FBGN0012034, FBGN0051075, FBGN0012036, FBGN0267385, FBGN0002719, FBGN0036857, FBGN0033246, FBGN0262782	167	45	2737	2.91364	0.710141	0.0572646	16.3915
KEGG_PATHWAY	dme04142:Lysosome	12	1.55039	0.0231214	FBGN0038613, FBGN0036768, FBGN0001089, FBGN0032253, FBGN0261675, FBGN0039801, FBGN0000477, FBGN0032192, FBGN0051148, FBGN0027611, FBGN0039800, FBGN0034229	167	93	2737	2.11474	0.814424	0.0737013	21.6114
KEGG_PATHWAY	dme00053:Ascorbate and aldarate metabolism	6	0.775194	0.0320056	FBGN0040253, FBGN0051075, FBGN0012036, FBGN0036857, FBGN0026314, FBGN0026755	167	30	2737	3.27784	0.903873	0.0968167	28.7223
KEGG_PATHWAY	dme00280:Valine, leucine and isoleucine degradation	6	0.775194	0.0363515	FBGN0051075, FBGN0012036, FBGN0036824, FBGN0021765, FBGN0036857, FBGN0035811	167	31	2737	3.17211	0.930475	0.105138	31.9837
KEGG_PATHWAY	dme00220:Arginine biosynthesis	4	0.516796	0.039945	FBGN0001125, FBGN0023535, FBGN0026565, FBGN0001124	167	13	2737	5.04284	0.946872	0.110773	34.5779
KEGG_PATHWAY	dme00340:Histidine metabolism	3	0.387597	0.0466617	FBGN0051075, FBGN0012036, FBGN0036857	167	6	2737	8.19461	0.967953	0.123947	39.1883
KEGG_PATHWAY	dme00640:Propanoate metabolism	4	0.516796	0.0796092	FBGN0012034, FBGN0033246, FBGN0035811, FBGN0004888	167	17	2737	3.85629	0.997453	0.198459	57.8308
KEGG_PATHWAY	dme00410:beta-Alanine metabolism	4	0.516796	0.0914429	FBGN0051075, FBGN0012036, FBGN0036857, FBGN0035811	167	18	2737	3.64205	0.998997	0.218542	63.1449
KEGG_PATHWAY	dme00250:Alanine, aspartate and glutamate metabolism	5	0.645995	0.0949427	FBGN0041194, FBGN0001125, FBGN0026565, FBGN0001124, FBGN0033543	167	29	2737	2.82573	0.99924	0.219385	64.5961
